# Supplementary material for: Instantaneous Self-Powered Sensing System Based on Planar-Structured Rotary Triboelectric Nanogenerator
Source: MDPI journal article supplement (doi:10.3390/s21113741), 2021-05-28
Supplement: s1 [file s1]

## Article

# Instantaneous Self-Powered Sensing System Based on Planar-Structured Rotary Triboelectric Nanogenerator

Shuangyang Kuang <sup>1,2,3</sup>, Xiaochen Suo <sup>2</sup>, Peiyi Song <sup>2</sup> and Jianjun Luo <sup>1,3,\*</sup>

<sup>1</sup> CAS Center for Excellence in Nanoscience, Beijing Institute of Nanoenergy and Nanosystems, Chinese Academy of Sciences, Beijing 100083, China

<sup>2</sup> MOE Key Laboratory of Fundamental Physical Quantities Measurement, School of Physics, Huazhong University of Science and Technology, Wuhan 430074, China; 2018508001@hust.edu.cn

<sup>3</sup> School of Nanoscience and Technology, University of Chinese Academy of Sciences, Beijing 100049, China

\* Correspondence: Correspondence: luojianjun@binn.cas.cn (J.L.)

The assembly process of the self-powered RF transmission system in the door shell is shown in the following figure: make two door shells; make the stator by fixing the electrode layer on a substrate made of PMMA, and fixing a layer of PTFE on the electrode layer; fix the stator on one of the door shells; fix the transformer, the PMC, and the emitter module on the door shell; connect the pr-TENG, the transformer, the PMC, and the emitter module; fix the bought doorknob on another door shell; fix the rotor substrate on the doorknob; fix the rotor on the rotor substrate; fasten the two door shells together, and make the rotor and stator to be coaxial.

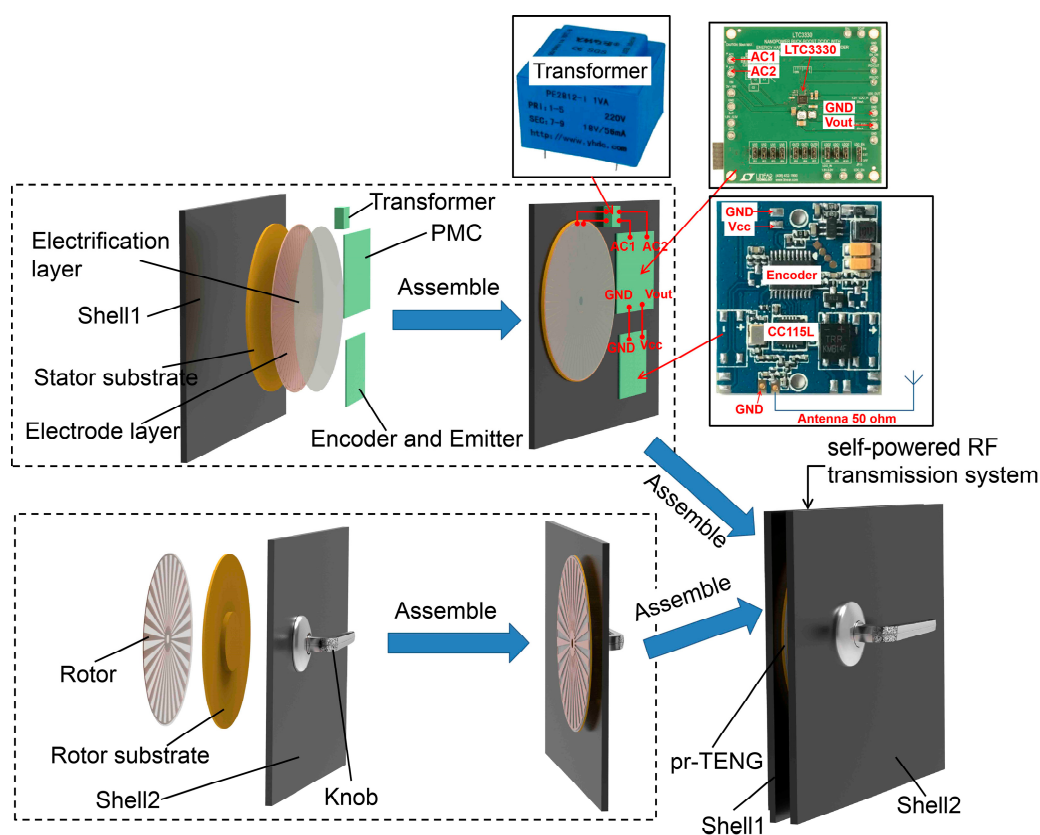

**Figure S1.** The assembly process of the self-powered RF transmission system.
